# Supplementary material
Source: PubMed Central journal article supplement (PMC103305)
Supplement: nar_28_9_1969__1.pdf [file nar_28_9_1969__1.pdf]

SUPPLEMENTARY MATERIAL

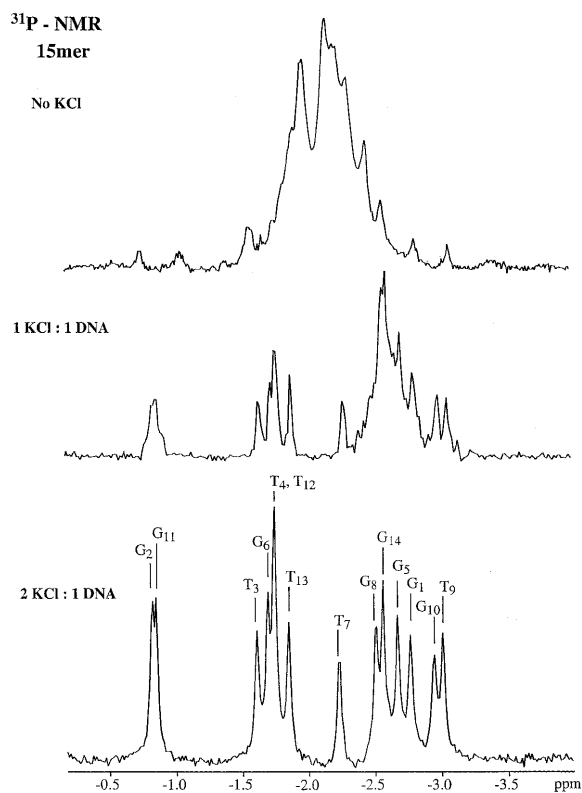

Figure S1. 161 MHz proton decoupled  $^{31}\text{P}$ -NMR spectrum of d(GGTTGGTGTGGTTGG) at 0, 1 and 2 potassiums per DNA.

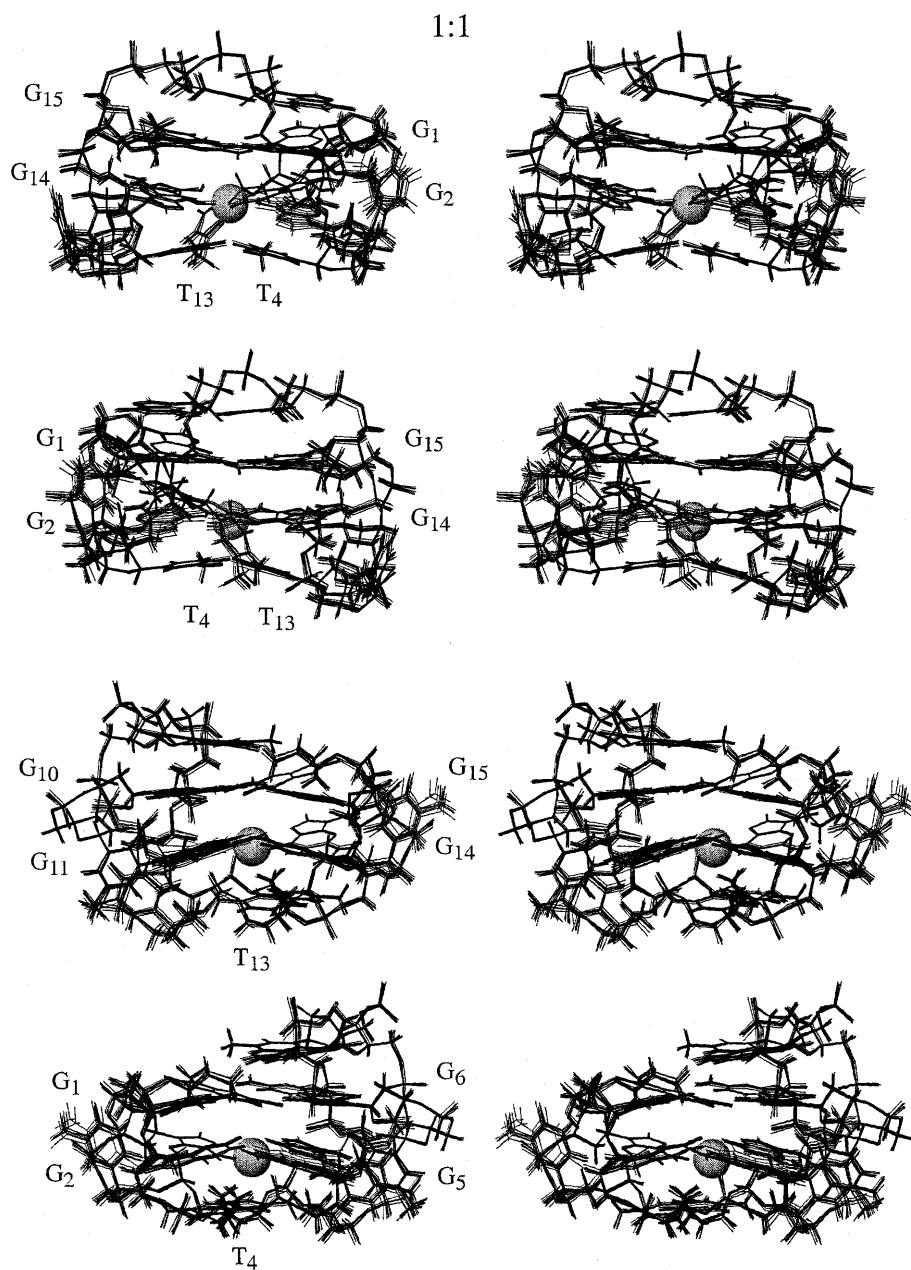

**Figure S2.** Ten structures from 80 to 100 ps extracted from the trajectory of the 2:1 potassium:DNA complex at 2 ps intervals. The structures are shown in stereo mode with the minimum energy potassium positions of the 100 ps structures presented in CPK format. The sphere depicting the potassium ions has a van der Waals radius of 1.96 Å.

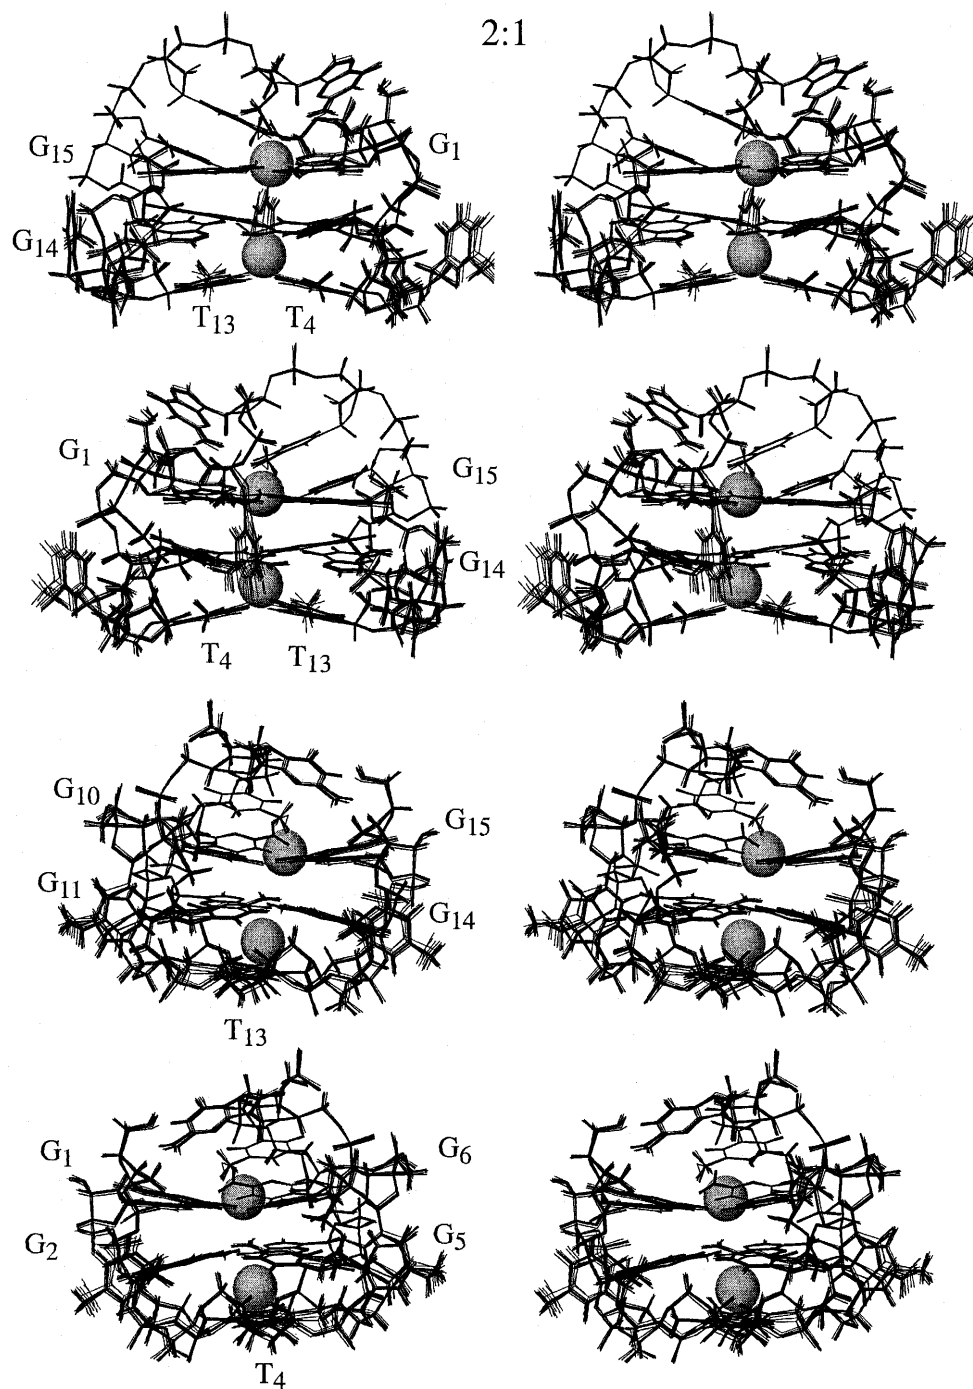

**Figure S3.** Ten structures from 80 to 100 ps extracted from the trajectory of the 1:1 potassium:DNA complex at 2 ps intervals. The structures are shown in stereo mode with the minimum energy potassium positions of the 100 ps structures presented in CPK format. The sphere depicting the potassium ions has a van der Waals radius of 1.96 Å.

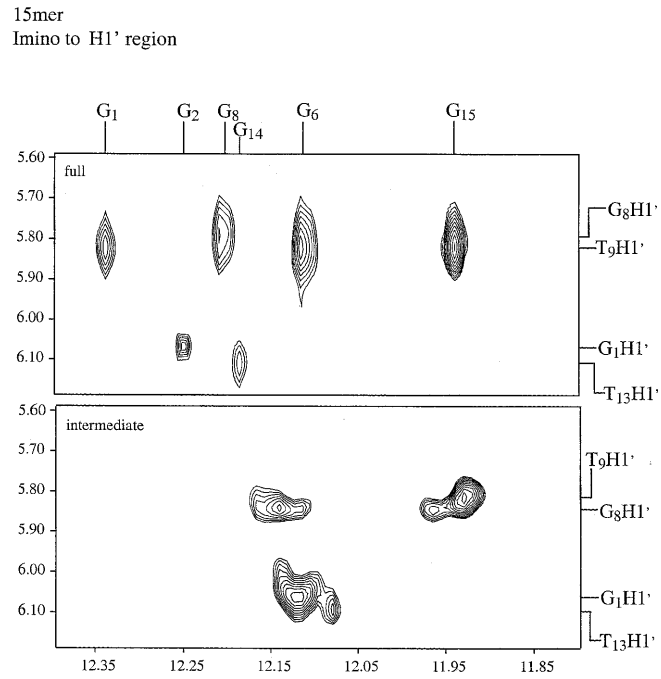

**Figure S4.** A portion of the 250 ms mixing time, 500 MHz NOESY spectra of the 15mer in H<sub>2</sub>O is presented. The region contains some of the NOE crosspeaks of the imino protons of the residues 1, 6, 10 and 15. The spectrum obtained from the 2:1 sample is shown on top and the spectrum of the 1:1 sample at the bottom.

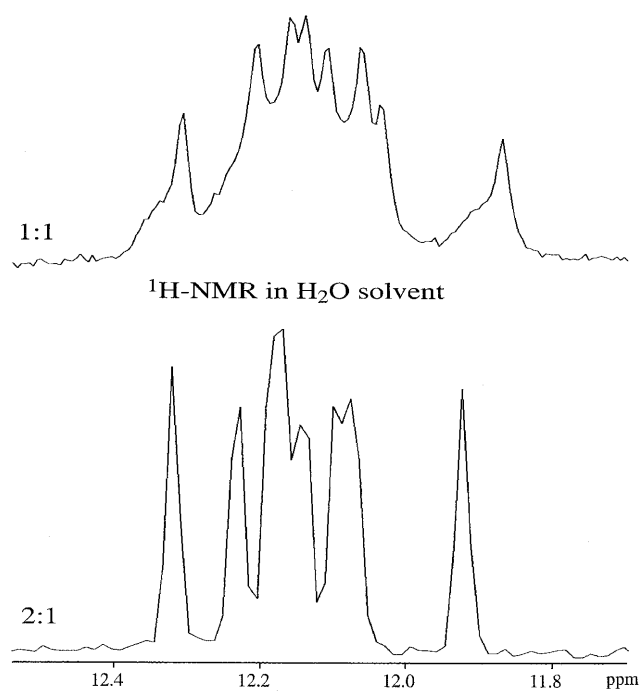

**Figure S5.** The  $^1\text{H-NMR}$  spectrum in  $\text{H}_2\text{O}$  solvent, showing the imino region of the 1:1, top, and 2:1, bottom, potassium:DNA samples.

**Table S1.** The assignments of the saturated and intermediate forms of the 15mer are listed

| 1:1             | H6/<br>H8 | H1'  | H2'  | H2'' | H3'  | H4'  | H5'/H5''  | CH <sub>3</sub> |
|-----------------|-----------|------|------|------|------|------|-----------|-----------------|
| G <sub>1</sub>  | 7.44      | 5.99 | 3.21 | 3.21 | 5.24 | 4.64 | 4.27/     |                 |
| G <sub>2</sub>  | 8.22      | 5.96 | 3.26 | 2.44 | 5.25 | 4.52 | 4.31      |                 |
| T <sub>3</sub>  | 7.95      | 6.14 | 2.31 | 2.45 | 5.02 |      |           | 1.98            |
| T <sub>4</sub>  | 7.19      | 6.08 | 2.18 | 2.78 | 4.97 | 4.29 | 4.01      | 1.01            |
| G <sub>5</sub>  | 7.46      | 6.10 | 3.68 | 3.11 | 4.89 | 4.42 | 4.24/4.30 |                 |
| G <sub>6</sub>  | 7.74      | 5.93 | 3.00 | 2.76 | 5.27 | 4.60 | 4.28      |                 |
| T <sub>7</sub>  | 7.98      | 6.53 | 2.77 | 2.66 | 4.91 |      |           | 2.01            |
| G <sub>8</sub>  | 7.50      | 5.74 | 1.99 | 2.76 | 5.21 | 4.33 | 3.96/4.05 |                 |
| T <sub>9</sub>  | 7.28      | 5.76 | 1.98 | 2.49 | 4.71 | 3.81 | 3.06/3.62 | 1.79            |
| G <sub>10</sub> | 7.47      | 5.97 | 3.81 | 3.11 | 4.94 | 4.31 | 4.17      |                 |
| G <sub>11</sub> | 8.33      | 5.95 | 3.25 | 2.43 | 5.23 | 4.48 | 4.31      |                 |
| T <sub>12</sub> | 7.95      | 6.14 | 2.31 | 2.45 | 4.76 |      |           | 2.02            |
| T <sub>13</sub> | 7.27      | 6.14 | 2.11 | 2.87 | 5.04 | 4.26 | 3.96      | 1.05            |
| G <sub>14</sub> | 7.51      | 5.99 | 3.67 | 3.18 | 4.70 | 4.31 | 4.19      |                 |
| G <sub>15</sub> | 8.12      | 6.13 | 2.79 | 2.56 | 4.91 | 4.76 | 4.08/4.10 |                 |

| saturated       | H6/<br>H8 | H1'  | H2'  | H2'' | H3'  | H4'  | H5'/H5''  | CH <sub>3</sub> |
|-----------------|-----------|------|------|------|------|------|-----------|-----------------|
| G <sub>1</sub>  | 7.42      | 6.08 | 2.96 | 2.96 | 4.99 | 4.40 | 4.03/4.12 |                 |
| G <sub>2</sub>  | 8.20      | 6.03 | 3.04 | 2.34 | 5.15 | 4.41 | 4.23      |                 |
| T <sub>3</sub>  | 7.90      | 6.19 | 2.22 | 2.56 | 4.91 | 4.29 | 4.24/4.32 | 1.98            |
| T <sub>4</sub>  | 7.18      | 6.07 | 2.06 | 2.66 | 4.88 | 4.20 | 3.92      | 0.98            |
| G <sub>5</sub>  | 7.43      | 6.04 | 3.38 | 2.91 | 4.87 | 4.41 | 4.23/4.28 |                 |
| G <sub>6</sub>  | 7.70      | 5.95 | 2.79 | 2.61 | 5.12 | 4.45 | 4.23      |                 |
| T <sub>7</sub>  | 7.93      | 6.49 | 2.51 | 2.61 | 4.86 | 4.43 | 4.24/4.28 | 1.98            |
| G <sub>8</sub>  | 7.47      | 5.77 | 1.98 | 2.32 | 4.77 | 3.98 | 4.01/4.10 |                 |
| T <sub>9</sub>  | 7.26      | 5.82 | 1.96 | 2.41 | 4.62 | 3.79 | 3.01/3.55 | 1.79            |
| G <sub>10</sub> | 7.45      | 6.06 | 3.72 | 2.93 | 4.92 | 4.28 | 4.14      |                 |
| G <sub>11</sub> | 8.23      | 6.02 | 2.98 | 2.33 | 5.14 | 4.39 | 4.22      |                 |
| T <sub>12</sub> | 7.90      | 6.19 | 2.20 | 2.58 | 4.91 | 4.29 | 4.24/4.32 | 1.98            |
| T <sub>13</sub> | 7.25      | 6.11 | 2.08 | 2.72 | 4.90 | 4.22 | 3.92      | 1.03            |
| G <sub>14</sub> | 7.48      | 6.08 | 3.51 | 2.96 | 4.92 | 4.42 | 4.30/4.37 |                 |
| G <sub>15</sub> | 8.09      | 6.16 | 2.69 | 2.44 | 4.80 | 4.25 | 4.12/4.18 |                 |

**Table S2.** The intrasidue and interresidue NOEs with the largest percentage difference between the saturated and intermediate forms of the 15mer are presented in this table

| intrasidue      |  | H8/H6 – H1' |       | H8/H6 – H2' |       | H8/H6 – H2'' |       | H8/H6 – H3' |       |
|-----------------|--|-------------|-------|-------------|-------|--------------|-------|-------------|-------|
|                 |  | full        | inter | full        | inter | full         | inter | full        | inter |
| T <sub>3</sub>  |  | 93.3        | 61.6  | 106.8       | 140.9 | 85.2         | 45.1  | 37.5        | 26.8  |
| T <sub>7</sub>  |  | 107.6       | 112.0 | 489.1       | 501.8 | 419.1        | 434.6 | 34.2        | 41.6  |
| G <sub>8</sub>  |  | 92.0        | 57.7  | 317.9       | 209.8 | 306.6        | 202.3 | 127.2       | 86.0  |
| T <sub>9</sub>  |  | 93.9        | 66.9  | 375.0       | 247.5 | 102.7        | 68.8  | 31.0        | 22.5  |
| G <sub>10</sub> |  | 897.1       | 691.0 | 50.5        | 33.3  | 50.6         | 34.4  | 143.5       | 93.7  |
| T <sub>12</sub> |  | 93.3        | 60.5  | 106.8       | 140.9 | 85.2         | 45.1  | 37.5        | 24.7  |

| interresidue                      |  | H8/H6 – H1' |       | H8/H6 – H2' |       | H8/H6 – H2'' |       |
|-----------------------------------|--|-------------|-------|-------------|-------|--------------|-------|
|                                   |  | Full        | Inter | Full        | Inter | Full         | inter |
| T <sub>7</sub> to G <sub>6</sub>  |  | 35.9        | 23.7  | 102.7       | 87.8  | 122.3        | 70.7  |
| G <sub>8</sub> to G <sub>6</sub>  |  | 27.7        | 38.8  | 94.6        | 121.2 | 181.0        | 219.4 |
| G <sub>8</sub> to T <sub>7</sub>  |  |             |       |             |       | 122.3        | 69.9  |
| T <sub>9</sub> to G <sub>8</sub>  |  | 83.2        | 94.9  | 182.6       | 190.5 | 92.6         | 111.1 |
| G <sub>15</sub> to G <sub>6</sub> |  |             |       |             |       | 79.9         | 52.7  |
